# Supplementary material for: Surgery Prolongs the Survival of Patients with Metastatic, Recurrent, or Unresectable Locally Advanced Gastrointestinal Stromal Tumors Response to Imatinib Mesylate Treatment: A Systematic Review and Meta-analysis
Source: Research Square preprint supplement (doi:10.21203/rs.3.rs-212183/v1), 2021-02-19
Supplement: Supplementary file 1 [file e50d2aac2bb26ad277e8a81d.docx]

**Table S1.** Quality assessment of studies included

| Study | Year | Sample (*n*) | Selection | Comparability | Outcome | NOS |
| --- | --- | --- | --- | --- | --- | --- |
| Bauer et al. | 2005 | 78 | 3 | 1 | 1 | 5 |
| Blesius et al. | 2011 | 25 | 2 | 1 | 1 | 4 |
| Chang et al. | 2015 | 182 | 4 | 1 | 1 | 6 |
| Du et al. | 2014 | 41 | / | / | / | RCT |
| Kim et al. | 2019 | 312 | 3 | 1 | 2 | 4 |
| Park et al. | 2014 | 134 | 4 | 2 | 1 | 7 |
| Rubio et al. | 2015 | 171 | 2 | 1 | 1 | 4 |
| Shen et al. | 2015 | 25 | 3 | 1 | 0 | 3 |
| Wang et al. | 2020 | 51 | 3 | 1 | 1 | 6 |
| Xiao et al. | 2018 | 100 | 4 | 1 | 1 | 6 |

**Abbreviations:** NOS, Newcastle-Ottawa Scale.
